# Supplementary material for: Hypo-Expression of Tuberin Promotes Adenomyosis via the mTOR1-Autophagy Axis
Source: Front Cell Dev Biol. 2021 Jul 29;9:710407. doi: 10.3389/fcell.2021.710407 (PMC8358309; doi:10.3389/fcell.2021.710407)
Supplement: Supplementary file 6 [file Table_1.XLSX]

## Sheet: Sheet1
Table S1 The antibodies applied in this study
Name of antibodies	Species&Dilution	Source	Application
MAP1LC3A(LC3A)	Rabbit, 1:100	Abcam, ab52768	IF
Tuberin/TSC2	Rabbit, 1:200/1:1000	CST,4308S	IF/WB
Phospho-mTOR(Ser2448)	Rabbit, 1:1000	CST,5536S	WB
mTOR	Rabbit, 1:1000	CST,2983S	WB
LC3A/B	Rabbit, 1:1000	CST,12741S	WB
N-Cadherin	Rabbit, 1:1000	CST,13116S	WB
E-Cadherin	Rabbit, 1:1000	CST,3195S	WB
Snai1	Mouse, 1:1000	CST,3895S	WB
Slug	Rabbit, 1:1000	CST,9585S	WB
α-tubulin	Mouse, 1:6000	Sigma, T6074	WB
Donkey anti-Rabbit Alexa Fluor 555	Donkey, 1:1000	Thermo Fisher,A32794	IF
Donkey anti-Rabbit Alexa Fluor 488	Donkey, 1:1000	Thermo Fisher,A32790	IF
Anti-rabbit IgG, HRP-linked Antibody	Donkey, 1:5000	CST,7074S	WB
Anti-mouse IgG, HRP-linked Antibody	Donkey, 1:5000	CST,7076S	WB
